# Supplementary material
Source: PubMed Central journal article supplement (PMC2556013)
Supplement: M708447200_1.pdf [file M708447200_1.pdf]

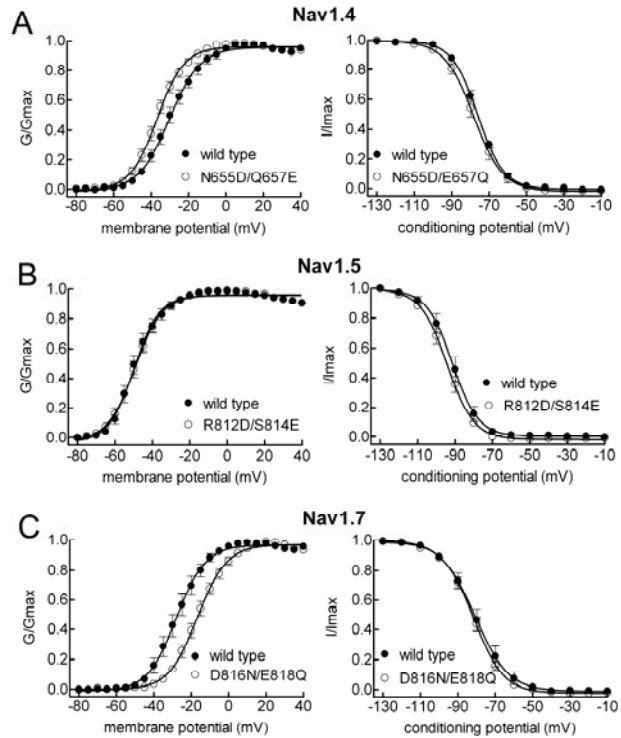

**Supplemental Figure 1: Functional properties of activation and inactivation kinetics of WT and double mutant sodium channels expressing HEK293 cells.** Channel conductance ( $G$ , left column) and steady-state inactivation (right column) were calculated as described in the legend of Figure 3. Cells were held at  $-100$  mV. Recording currents from Nav1.4 (A), Nav1.5 (B) and Nav1.7 (C) started 5 min after establishing whole-cell configuration. Each data point came from 6-12 cells.

Supplemental Table 1

|                                | Nav1.4<br>WT    | Nav1.4<br>N655D/Q657E | Nav1.5<br>WT    | Nav1.5<br>R812D/S814E | Nav1.7<br>WT    | Nav1.7<br>D816N/E818Q |
|--------------------------------|-----------------|-----------------------|-----------------|-----------------------|-----------------|-----------------------|
| Activation ( $V_{1/2}$ , mV)   | $-30.4 \pm 0.5$ | $-36.9 \pm 0.4$       | $-49.9 \pm 0.6$ | $-45.9 \pm 0.5$       | $-28.0 \pm 0.6$ | $-16.7 \pm 0.4$       |
| Slope factor                   | $8.4 \pm 0.5$   | $7.3 \pm 0.4$         | $6.9 \pm 0.5$   | $7.4 \pm 0.4$         | $7.7 \pm 0.5$   | $7.7 \pm 0.4$         |
| Inactivation ( $V_{1/2}$ , mV) | $-76.1 \pm 0.4$ | $-78.3 \pm 0.7$       | $-91.5 \pm 0.9$ | $-94.3 \pm 0.6$       | $-80.9 \pm 1.0$ | $-81.7 \pm 0.6$       |
| Slope factor                   | $7.0 \pm 0.3$   | $7.8 \pm 0.6$         | $7.0 \pm 0.8$   | $7.2 \pm 0.5$         | $8.9 \pm 0.9$   | $8.0 \pm 0.5$         |

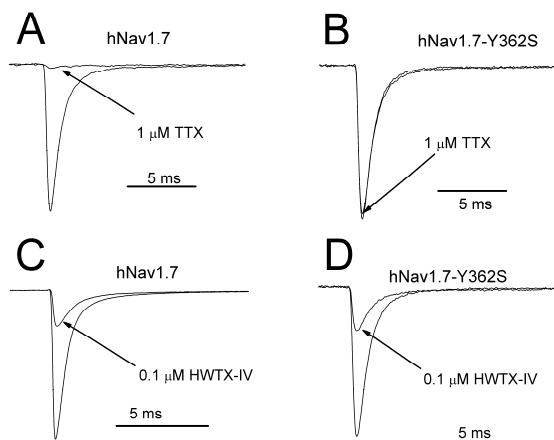

**Supplemental Figure 2.** A pore mutation that greatly decreases the sensitivity of VGSCs to TTX does not alter the sensitivity of Nav1.7 to HWTX-IV. (A,B) The Y362S mutation, located in the pore loop of domain 1, decreases the sensitivity of sodium channels to TTX by over 1000-fold. HWTX-IV (0.1  $\mu$ M) inhibits wild-type Nav1.7 channels (C) by  $71 \pm 3\%$  (n=5) and Nav1.7-Y362S channels (D) by  $69 \pm 4\%$  (n=4).

```

HwTx-I   ACKGVF DACTPGKNECC--PNRVCS DKHKWCKWKL
HwTx-IV  ECL E I F KACNPSNDQCCKSSKLVCSRKTRWCKYQI
ProTx-II YCQKWMWTCDSERK-CC--EGMVC--R-LWCKKKLW

```

**Supplemental Figure 3.** Alignment of amino-acid sequences for HWTX-I, HWTX-IV and ProTx-II are shown. Residues that are conserved between HWTX-IV and the other two toxins are shaded.
